# Supplementary material for: Mesoporous In2O3 nanocrystals: synthesis, characterization and NOx gas sensor at room temperature
Source: Royal Society of Chemistry journal article supplement (doi:10.1039/c5nj02214b), 2015-11-16
Supplement: c5nj02214b1.pdf [file c5nj02214b1.pdf]

## Mesoporous In<sub>2</sub>O<sub>3</sub> nanocrystals: synthesis, characterization and NO<sub>x</sub> gas sensor at room temperature

*Jun Gao<sup>‡a</sup>, Hongyuan Wu<sup>‡a,c</sup>, Jiao Zhou<sup>a</sup>, Liyuan Yao<sup>a</sup>, Guo Zhang<sup>a</sup>, Shuang Xu<sup>a</sup>, Yu Xie<sup>d</sup>, Li Li<sup>\*a</sup>,  
<sup>b</sup>, Keying Shi<sup>\*a</sup>*

<sup>a</sup> Key Laboratory of Functional Inorganic Material Chemistry, Ministry of Education. Key Laboratory of Physical Chemistry, School of Chemistry and Material Science, Heilongjiang University, Harbin, 150080, P. R. China.

<sup>b</sup> Key Laboratory of Chemical Engineering Process & Technology for High-efficiency Conversion, School of Chemistry and Material Science, Heilongjiang University, Harbin 150080, P. R. China.

<sup>c</sup> College of Chemistry and Chemical Engineering, Qiqihar University, Qiqihar 161006, P.R. China

<sup>d</sup> Department of Materials Chemistry, Nanchang Hangkong University, Nanchang 330063, P.R. China

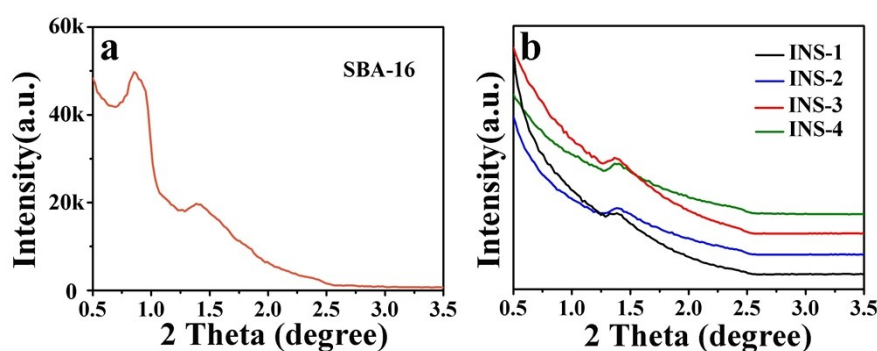

Fig. S1 Low-angle XRD X-ray diffraction diagrams of SBA-16 (1) and mesoporous In<sub>2</sub>O<sub>3</sub> materials replicated from mesoporous silica of INS-1, INS-2, INS-3, INS-4. respectively.

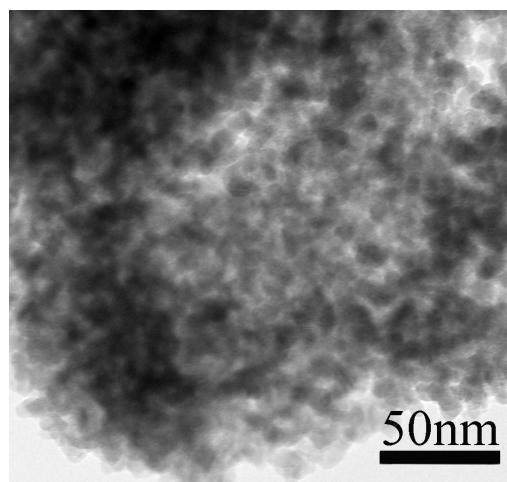

Fig. S2 TEM image of the INS-2.

Fig.S2 exhibited INS-2 sample was composed of  $\text{In}_2\text{O}_3$  nanoparticles (5~10 nm) with some mesopores.

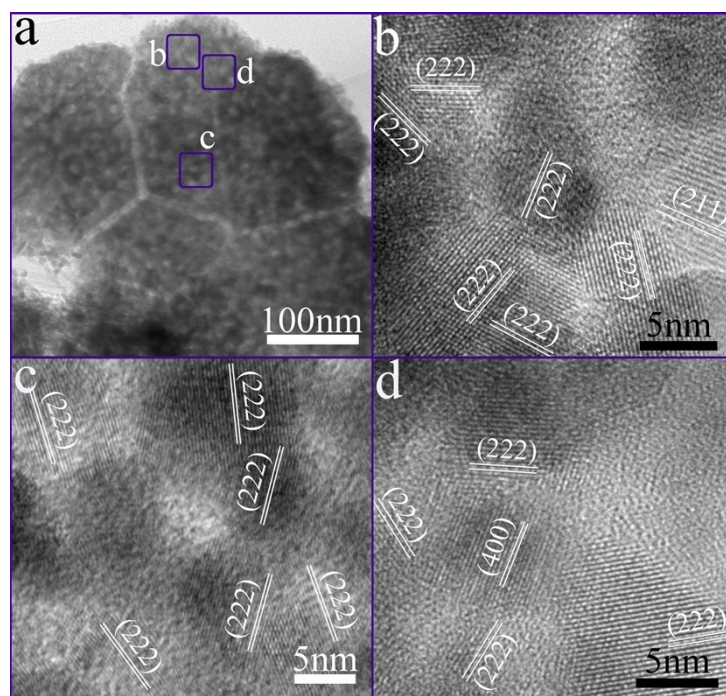

Fig. S3 TEM/HRTEM images of the INS-3. (a) TEM image, (b-d) HRTEM images of (a) INS-3.

Table S1 Comparison of the response-recovery results of response and response time(s) with different samples to NO<sub>x</sub> (RH: 42%)

| Volume concentration /ppm |                 | 97.0  | 48.5 | 29.1 | 9.70 | 4.85 | 2.91 | 0.97 |
|---------------------------|-----------------|-------|------|------|------|------|------|------|
| INS-1                     | Response        | 9.74  | 3.81 | 3.42 | 2.7  | 0.53 | -    | -    |
|                           | Response time/s | 105   | 131  | 56   | 167  | 35   | -    | -    |
| INS-2                     | Response        | 41.2  | 17.7 | 13.5 | 5.36 | 1.58 | 1.19 | 1.2  |
|                           | Response time/s | 196   | 276  | 409  | 450  | 409  | 323  | 165  |
| INS-3                     | Response        | 158.7 | 50.7 | 36.8 | 19.7 | 12.6 | 7.2  | 1.9  |
|                           | Response time/s | 87    | 65   | 206  | 131  | 48   | 49   | 45   |
| INS-4                     | Response        | 7.39  | 6.9  | 5.84 | 4.4  | 0.76 | -    | -    |
|                           | Response time/s | 267   | 200  | 257  | 333  | 89.3 | -    | -    |

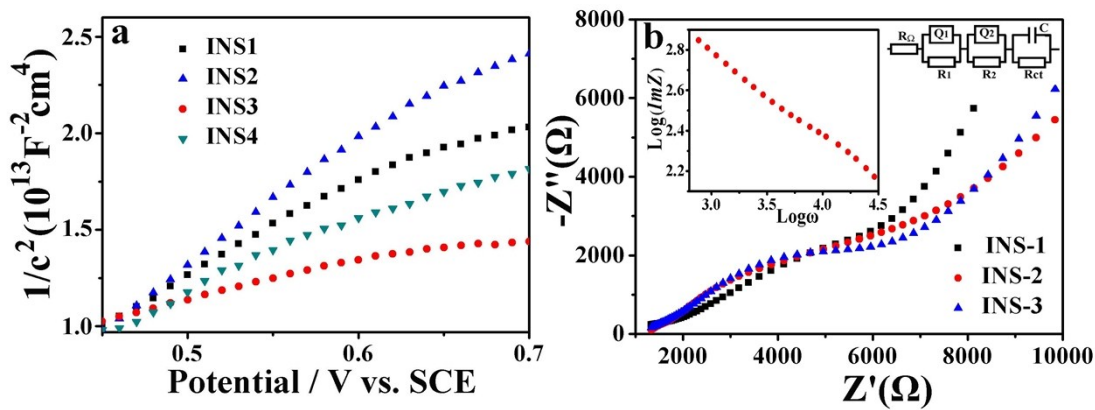

Fig. S4 (a) The Mott-Schottky curves of INS-1, INS-2, INS-3 and INS-4 samples, (b) The EIS curves of INS-1, INS-2 and INS-3 samples. The right inset is the corresponding equivalent circuit model, the inset in left shows the logarithmic plot of the imaginary part of the impedance.

Here  $R_{\Omega}$  indicates the uncompensated bulk resistance of the electrolyte, separator and electrode. The  $Q1R1$  parallel element corresponds to the electrode film interface capacitance ( $Q1$ ) and the surface pore resistance ( $R1$ ).<sup>1</sup> The  $Q2R2$  parallel element might be attributed to the possible break

down of the electrolyte and the electrode material's internal microstructures.  $R_{ct}$  is attributed to the charge-transfer resistance at the active material interface and C is the constant phase angle element, involving double layer capacitance.

Table S2 Carrier concentrations and fitted impedance parameters of the INS-1, INS-2 and INS-3.

| Samples | $R_{\Omega}(\Omega)$ | $R_1(\Omega)$      | $R_2(\Omega)$ | $R_{ct}(\Omega)$   | Carrier concentration<br>( $\text{cm}^{-3}$ ) |
|---------|----------------------|--------------------|---------------|--------------------|-----------------------------------------------|
| INS-1   | 972.8                | $5.71 \times 10^5$ | 1987          | $5.67 \times 10^4$ | $3.7 \times 10^{17}$                          |
| INS-2   | 846.6                | $3.34 \times 10^5$ | 2509          | $4.89 \times 10^4$ | $2.7 \times 10^{17}$                          |
| INS-3   | 562.4                | 6639               | 1314          | 125.2              | $9.3 \times 10^{17}$                          |

Notes and references

1 1 R. Sakamoto, Sh. Katagiri, H. Maeda, H. Nishihara, *Coordination Chemistry Reviews*, 2013, **257**, 1493-1506.
